# Supplementary material for: All-solid-state asymmetric supercapacitors based on cobalt hexacyanoferrate-derived CoS and activated carbon
Source: Royal Society of Chemistry journal article supplement (doi:10.1039/c6ra27331a), 2017-01-01
Supplement: c6ra27331a1.pdf [file c6ra27331a1.pdf]

## Supplementary Information

### All-Solid-State Asymmetric Supercapacitors Based on Cobalt Hexacyanoferrate Derived CoS and Activated Carbon†

**K. Subramani,<sup>a,b</sup> N. Sudhan,<sup>a,c</sup> R. Divya,<sup>a</sup> and M. Sathish<sup>a\*</sup>**

<sup>a</sup>Functional Materials Division, <sup>b</sup> Academy of Scientific and Innovative Research (AcSIR),  
<sup>c</sup>Centre for Education, CSIR-Central Electrochemical Research Institute, Karaikudi – 630 003,  
Tamilnadu, India.

Corresponding authors:

[marappan.sathish@gmail.com](mailto:marappan.sathish@gmail.com); [msathish@cecri.res.in](mailto:msathish@cecri.res.in)

## Supplementary Figures:

**Table S1.** Recent development of cobalt sulfide based electrode materials with different morphology

| S. No | Materials                      | Method                  | Morphology        | Reference |
|-------|--------------------------------|-------------------------|-------------------|-----------|
| 1     | Co <sub>9</sub> S <sub>8</sub> | Atomic layer deposition | Nanoparticles     | 1         |
| 2     | CoS/Graphene                   | Hydrothermal            | Nanoparticles     | 2         |
| 3     | CoS <sub>1.097</sub>           | Ostwald ripening        | Hierarchitectures | 3         |
| 4     | CoS <sub>x</sub> /CNT          | Hydrothermal            | Core/shell        | 4         |
| 5     | CoS                            | Hydrothermal            | Nanowires         | 5         |
| 6     | Graphene/CoS                   | Hydrothermal            | Nanoparticles     | 6         |
| 7     | CoS <sub>1.097</sub>           | Solvothermal            | Nanotube          | 7         |
| 8     | CoS                            | Hydrothermal            | Nanotube          | 8         |
| 9     | Co <sub>9</sub> S <sub>8</sub> | Hydrothermal            | Nanoflake         | 9         |
| 10    | Co <sub>9</sub> S <sub>8</sub> | Hydrothermal            | Octahedra         | 9         |
| 11    | CoS                            | Solvothermal            | Dumb-bells        | This work |

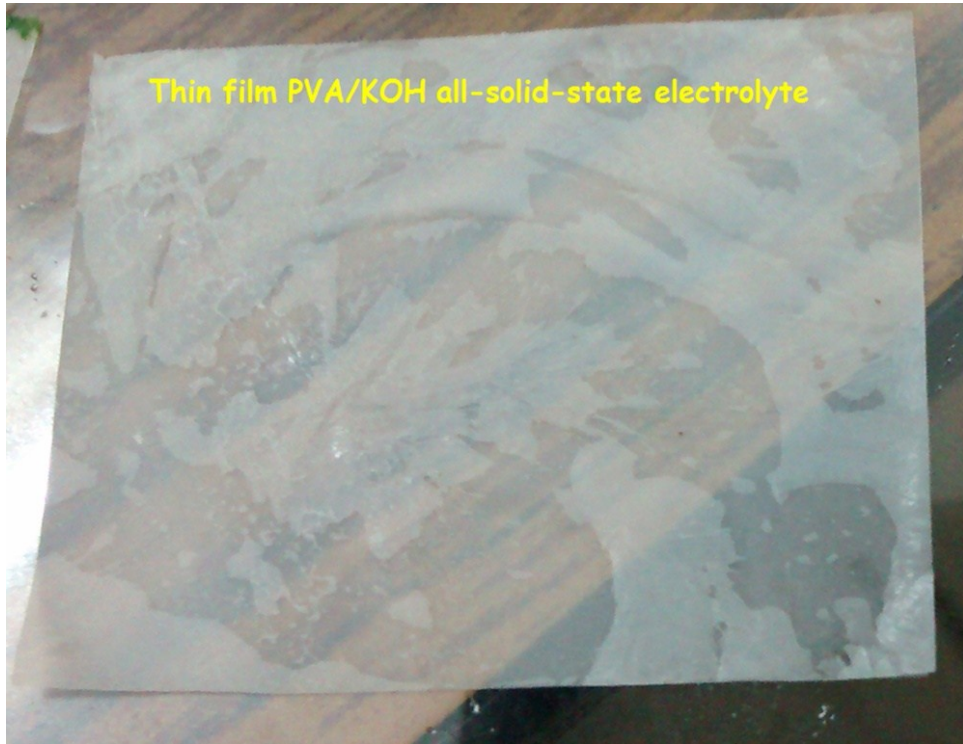

**Figure S1.** Fabricated PVA/KOH all-solid-state electrolyte thin film.

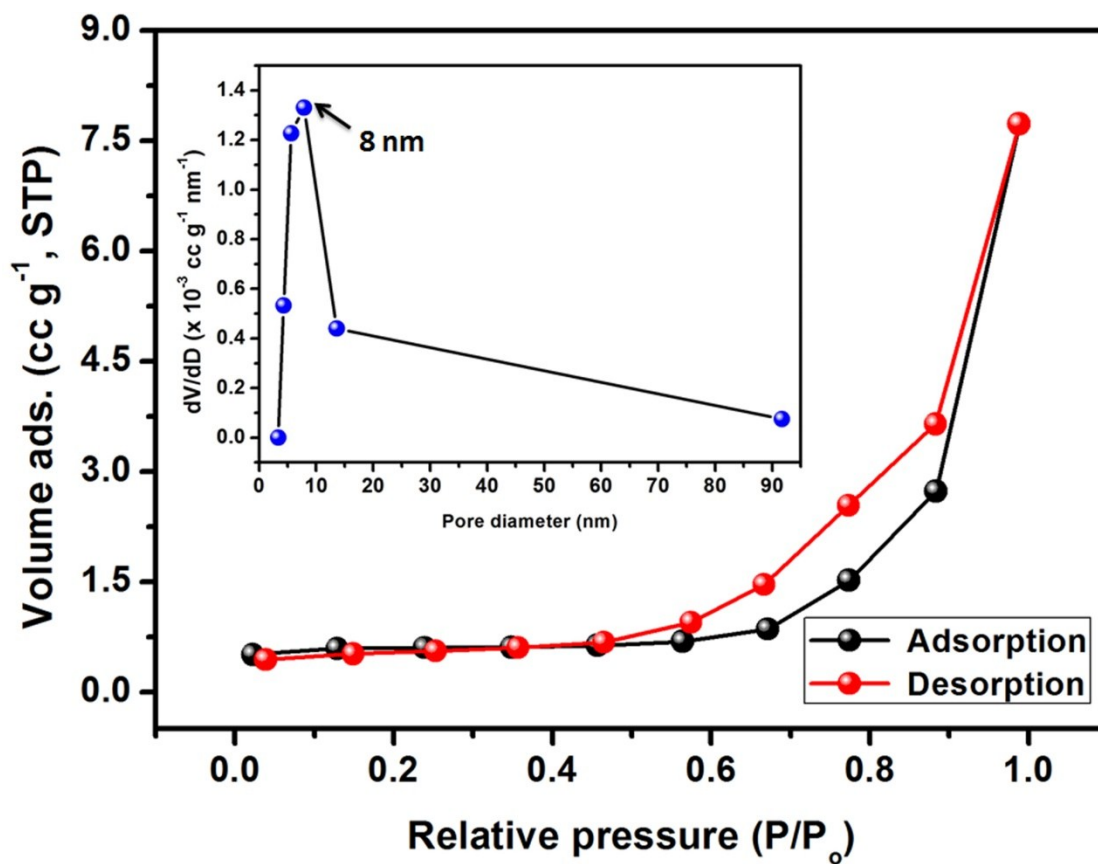

**Figure S2.** BET nitrogen adsorption/desorption isotherm and its corresponding pore-size distribution curve (inset) of CoS nanoparticles.

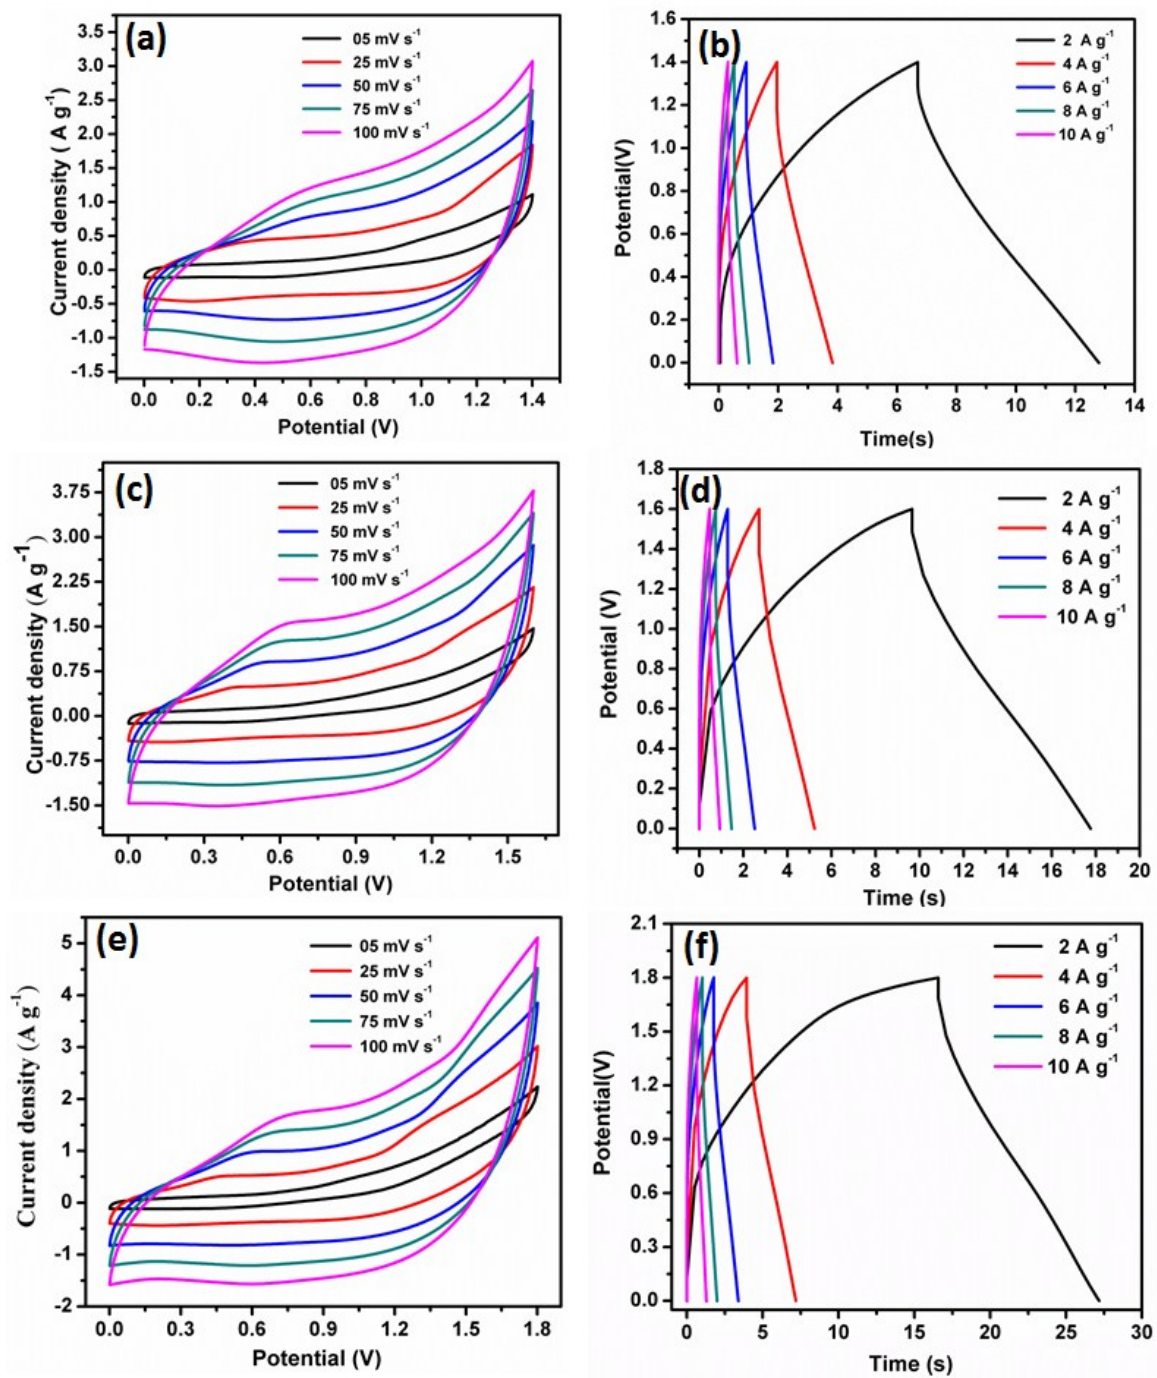

**Figure S3.** CV and CD profile of a flexible ASC cell in (a & b) 1.4, (c & d) 1.6 and (e & f) 1.8 V cell voltage at different scan rate and current density, respectively.

**Table S2.** Comparison of metal oxide/sulfide based all-solid-state asymmetric supercapacitors

| S. No. | Cathode                                  | Anode          | Cell Voltage (V) | Current density (A/g) | C <sub>sp</sub> (F/g) | Cycle life (No. of cycle) | Energy density (Wh/kg) | Power density (W/kg) | Journal name                       | Reference        |
|--------|------------------------------------------|----------------|------------------|-----------------------|-----------------------|---------------------------|------------------------|----------------------|------------------------------------|------------------|
| 1.     | Co <sub>9</sub> S <sub>8</sub> nanoflake | AC             | 1.6              | 1.25                  | 83                    | 89.5% (5000)              | 31.4                   | 200                  | <i>J. Mater. Chem. A</i>           | 9                |
| 2.     | Co <sub>9</sub> S <sub>8</sub> octahedra | AC             | 1.6              | 1.25                  | 18.6                  | 65% (5000)                | 7                      | 230                  | <i>J. Mater. Chem. A</i>           | 9                |
| 3.     | CoS <sub>x</sub> nanostrip               | graphene       | 1.5              | 0.001                 | 46.2                  | 84% (3000)                | 14.68                  | 369                  | <i>Energy Technol.</i>             | 10               |
| 4.     | Co(OH) <sub>2</sub> nanowires            | NTAC           | 1.6              | 0.0012                | 38.9                  | -                         | 13.6                   | 153                  | <i>J. Power Sources</i>            | 11               |
| 5.     | Co <sub>3</sub> O <sub>4</sub> nanowires | Carbon aerogel | 1.5              | 1                     | 57.4                  | 85% (1000)                | 17.9                   | 750                  | <i>J. Power Sources</i>            | 12               |
| 6.     | MnS                                      | AC             | 1.6              | 1                     | 110.4                 | 89.87% (5000)             | 37.6                   | 181.2                | <i>Sci. Rep.</i>                   | 13               |
| 7.     | Cu(OH) <sub>2</sub>                      | AC             | 1.6              | 4                     | 26.4                  | 90% (5000)                | 3.68                   | 1253                 | <i>J. Mater. Chem. A</i>           | 14               |
| 8.     | Fe <sub>3</sub> O <sub>4</sub> /Carbon   | porous carbon  | 1.4              | 1                     | 58.5                  | 70.8% (5000)              | 18.3                   | 351                  | <i>ACS Appl. Mater. Interfaces</i> | 15               |
| 9.     | Ni-Co-S                                  | graphene       | 1.8              | 2                     | 133                   | 82.2% (20000)             | 60                     | 1800                 | <i>J. Mater. Chem. A</i>           | 16               |
| 10.    | <b>CoS</b>                               | <b>AC</b>      | <b>1.8</b>       | <b>2</b>              | <b>47</b>             | <b>92% (5000)</b>         | <b>5.3</b>             | <b>1800</b>          | <b>-</b>                           | <b>This work</b> |

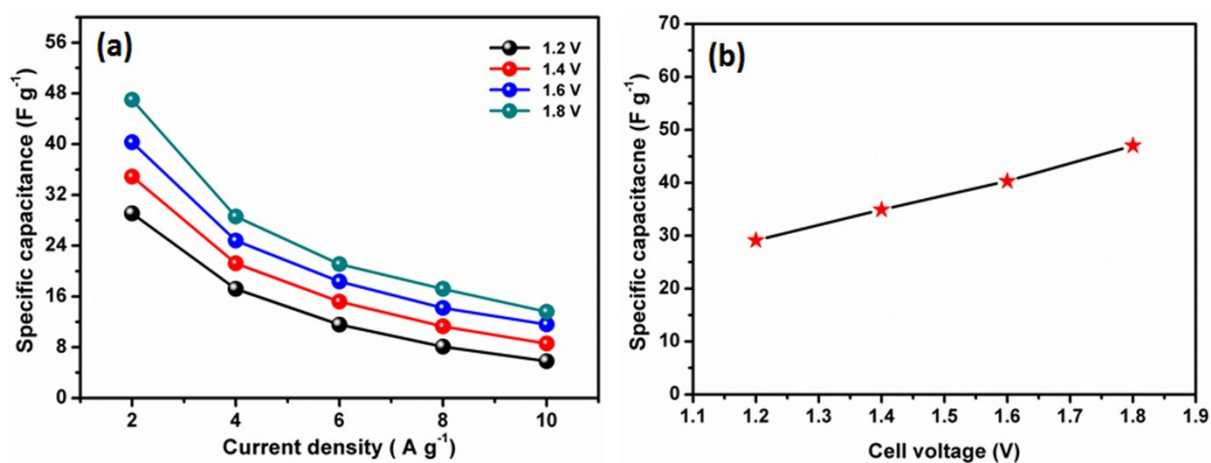

**Figure S4.** Specific capacitance of fabricated flexible all-solid-state ASC as a function of (a) different current density and (b) cell voltage.

**Table S3.** Specific capacitance of fabricated flexible all-solid-state ASC with different cell voltage at various current densities-

| Cell voltage (V) | Specific capacitance $C_{sp}$ (F g <sup>-1</sup> ) |                     |                     |                     |                     |
|------------------|----------------------------------------------------|---------------------|---------------------|---------------------|---------------------|
|                  | 2 A g <sup>-1</sup>                                | 4 A g <sup>-1</sup> | 6 A g <sup>-1</sup> | 8 A g <sup>-1</sup> | 10A g <sup>-1</sup> |
| 1.2              | 29.1                                               | 17.2                | 11.6                | 8.1                 | 5.8                 |
| 1.4              | 34.9                                               | 21.3                | 15.2                | 11.3                | 8.6                 |
| 1.6              | 40.3                                               | 24.8                | 18.4                | 14.2                | 11.6                |
| 1.8              | 47                                                 | 28.6                | 21.1                | 17.2                | 13.6                |

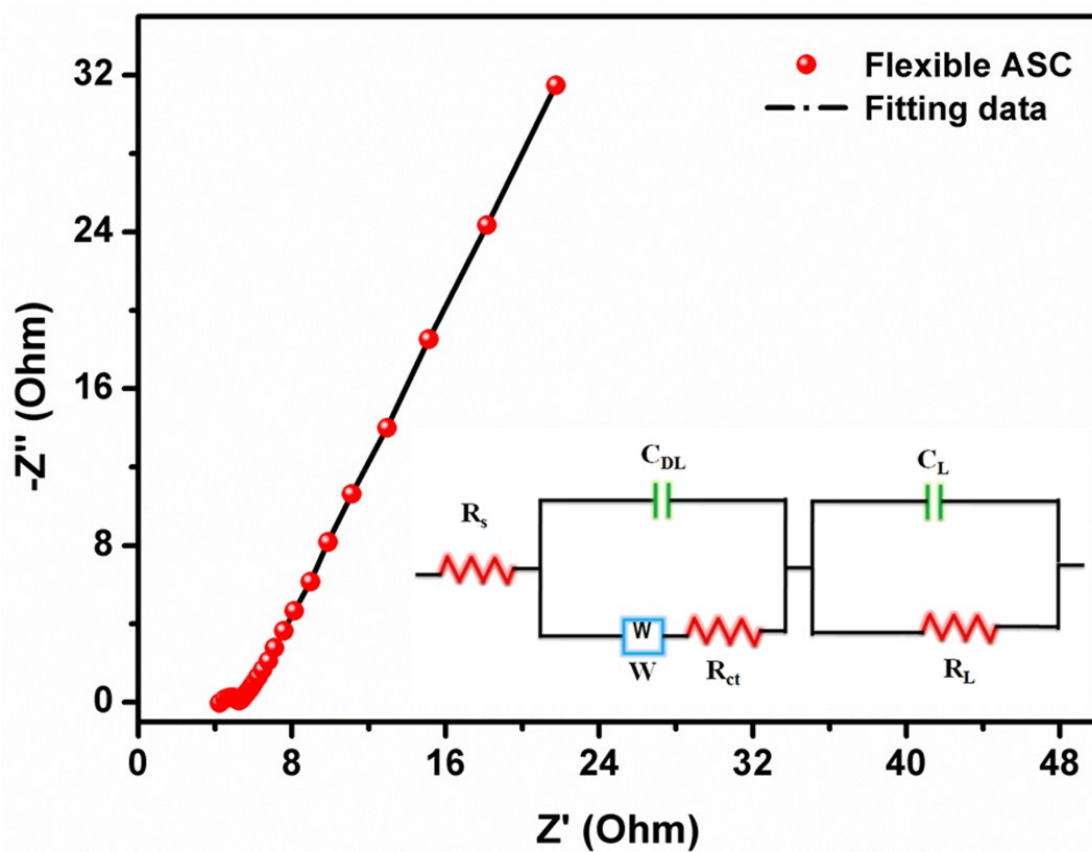

**Figure S5.** EIS Nyquist plots of fabricated flexible all-solid-state ASC and its corresponding equivalent circuits. (inset)



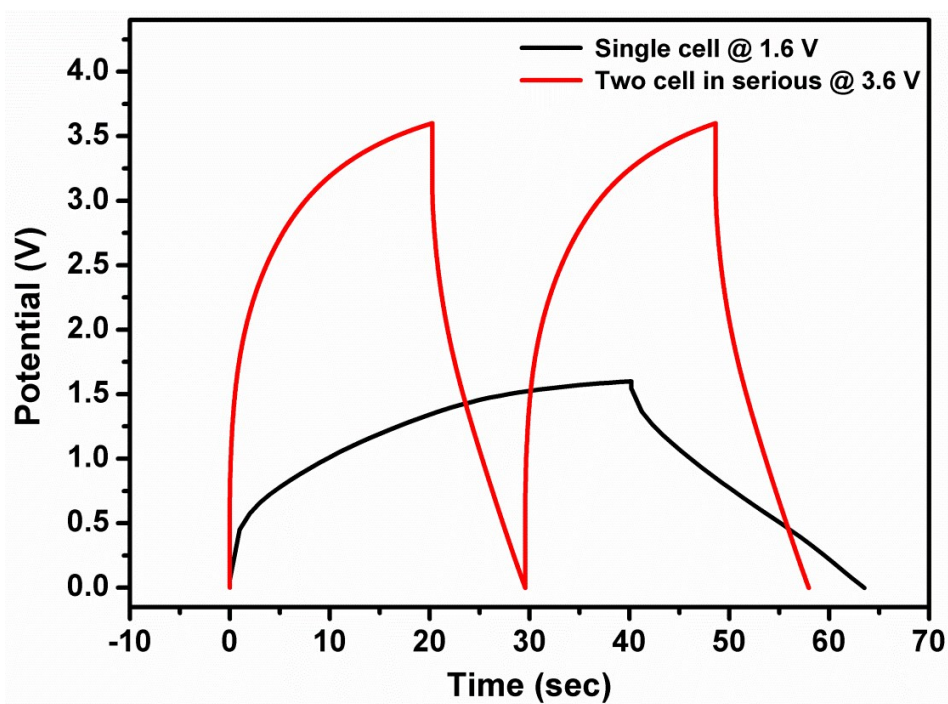

**Figure S6.** CD profile of single asymmetric cell (1.6 V) and two asymmetric cells were connected in series (3.6 V) at  $1 \text{ A g}^{-1}$  current density.

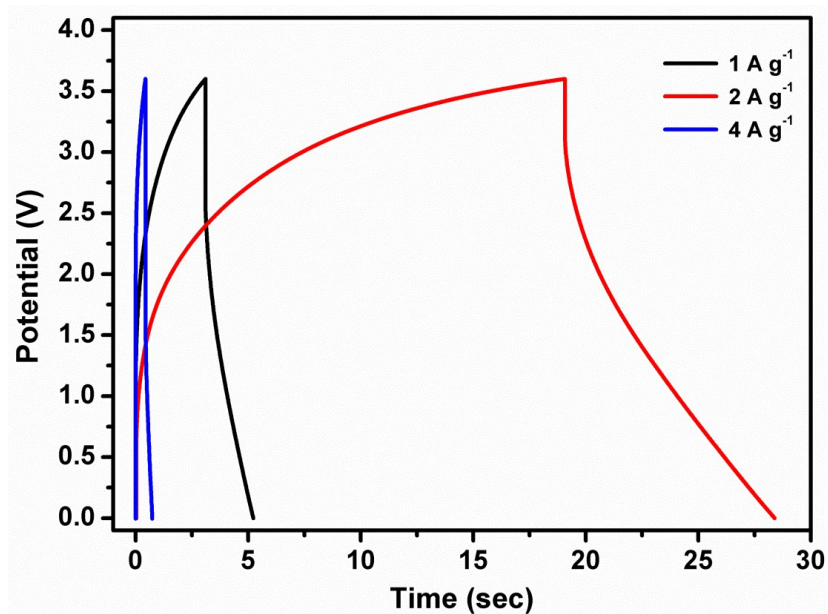

**Figure S7.** CD profile of two asymmetric cells connected in series for 3.6 V at different current densities.

## Reference

- 1 H. Li, Y. Gao, Y. Shao, Y. Su and X. Wang, *Nano Lett.*, 2015, **15**, 6689–6695.
- 2 X. Meng, J. Deng, J. Zhu, H. Bi, E. Kan and X. Wang, *Sci. Rep.*, 2016, **6**, 21717.
- 3 Q. Wang, L. Jiao, H. Du, J. Yang, Q. Huan, W. Peng, Y. Si, Y. Wang and H. Yuan, *CrystEngComm*, 2011, **13**, 6960.
- 4 M. L. Mao, L. Mei, L. C. Wu, Q. H. Li and M. Zhang, *Rsc Adv.*, 2014, **4**, 12050–12056.
- 5 S. Bao, C. M. Li, C. Guo and Y. Qiao, *J. Power Sources*, 2008, **180**, 676–681.
- 6 X. Meng, H. Sun, J. Zhu, H. Bi, Q. Han, X. Liu and X. Wang, *New J. Chem.*, 2016, **40**, 2843–2849.
- 7 S. Liu, C. Mao, Y. Niu, F. Yi, J. Hou, S. Lu, J. Jiang, M. Xu and C. Li, *ACS Appl. Mater. Interfaces*, 2015, **7**, 25568–25573.
- 8 H. Wan, X. Ji, J. Jiang, J. Yu, L. Miao, L. Zhang, S. Bie, H. Chen and Y. Ruan, *J. Power Sources*, 2013, **243**, 396–402.
- 9 R. B. Rakhi, N. a. Alhebshi, D. H. Anjum and H. N. Alshareef, *J. Mater. Chem. A*, 2014, **2**, 16190–16198.
- 10 D. P. Dubal, G. S. Gund, C. D. Lokhande and R. Holze, *Energy Technol.*, 2014, **2**, 401–408.
- 11 Y. Tang, Y. Liu, S. Yu, S. Mu, S. Xiao, Y. Zhao and F. Gao, *J. Power Sources*, 2014, **256**, 160–169.
- 12 W. Liu, X. Li, M. Zhu and X. He, *J. Power Sources*, 2015, **282**, 179–186.
- 13 T. Chen, Y. Tang, Y. Qiao, Z. Liu, W. Guo, J. Song, S. Mu, S. Yu, Y. Zhao and F. Gao, *Sci. Rep.*, 2016, **6**, 23289.
- 14 J. Chen, J. Xu, S. Zhou, N. Zhao and C. Wong, *J. Mater. Chem. A*, 2015, **3**, 17385–17391.
- 15 H. Fan, R. Niu, J. Duan, W. Liu and W. Shen, *ACS Appl. Mater. Interfaces*, 2016, acsami.6b05415.
- 16 J. Shi, X. Li, G. He, L. Zhang and M. Li, *J. Mater. Chem. A*, 2015, **3**, 20619–20626.
